# Supplementary material
Source: publisher figshare collection journal article supplement (https://acs.figshare.com/ndownloader/files/4548562)
Supplement: Supplementary file 1 [file 4548562]

 
data_08369 
  
_audit_creation_method            SHELXL-97 
_chemical_name_systematic 
; 
 ? 
; 
_chemical_name_common             ? 
_chemical_melting_point           ? 
_chemical_formula_moiety          ? 
_chemical_formula_sum 
 'C57 H58 N2 O W' 
_chemical_formula_weight          970.90 
  
loop_ 
 _atom_type_symbol 
 _atom_type_description 
 _atom_type_scat_dispersion_real 
 _atom_type_scat_dispersion_imag 
 _atom_type_scat_source 
 'C'  'C'   0.0033   0.0016 
 'International Tables Vol C Tables 4.2.6.8 and 6.1.1.4' 
 'H'  'H'   0.0000   0.0000 
 'International Tables Vol C Tables 4.2.6.8 and 6.1.1.4' 
 'N'  'N'   0.0061   0.0033 
 'International Tables Vol C Tables 4.2.6.8 and 6.1.1.4' 
 'O'  'O'   0.0106   0.0060 
 'International Tables Vol C Tables 4.2.6.8 and 6.1.1.4' 
 'W'  'W'  -0.8490   6.8722 
 'International Tables Vol C Tables 4.2.6.8 and 6.1.1.4' 
  
_symmetry_cell_setting            Triclinic 
_symmetry_space_group_name_H-M    P-1 
  
loop_ 
 _symmetry_equiv_pos_as_xyz 
 'x, y, z' 
 '-x, -y, -z' 
  
_cell_length_a                    11.3574(8) 
_cell_length_b                    14.0541(10) 
_cell_length_c                    14.9825(11) 
_cell_angle_alpha                 81.2420(10) 
_cell_angle_beta                  81.3230(10) 
_cell_angle_gamma                 80.7480(10) 
_cell_volume                      2313.2(3) 
_cell_formula_units_Z             2 
_cell_measurement_temperature     100(2) 
_cell_measurement_reflns_used     9986 
_cell_measurement_theta_min       2.3 
_cell_measurement_theta_max       30.5 
  
_exptl_crystal_description        block 
_exptl_crystal_colour             yellow 
_exptl_crystal_size_max           0.25 
_exptl_crystal_size_mid           0.20 
_exptl_crystal_size_min           0.20 
_exptl_crystal_density_meas       ? 
_exptl_crystal_density_diffrn     1.394 
_exptl_crystal_density_method     'not measured' 
_exptl_crystal_F_000              992 
_exptl_absorpt_coefficient_mu     2.539 
_exptl_absorpt_correction_type    multi-scan 
_exptl_absorpt_correction_T_min   0.5694 
_exptl_absorpt_correction_T_max   0.6307 
_exptl_absorpt_process_details    'SADABS (Sheldrick, 2008)' 
  
_exptl_special_details 
; 
 'Siemens three-circle diffractometer, Bruker APEX CCD' 
; 
  
_diffrn_ambient_temperature       100(2) 
_diffrn_radiation_wavelength      0.71073 
_diffrn_radiation_type            MoK\a 
_diffrn_radiation_source          'fine-focus sealed tube' 
_diffrn_radiation_monochromator   graphite 
_diffrn_measurement_device_type   'Bruker Smart APEX CCD' 
_diffrn_measurement_method        'omega and phi scans' 
_diffrn_detector_area_resol_mean  8.3 
_diffrn_reflns_number             61690 
_diffrn_reflns_av_R_equivalents   0.0334 
_diffrn_reflns_av_sigmaI/netI     0.0243 
_diffrn_reflns_limit_h_min        -15 
_diffrn_reflns_limit_h_max        15 
_diffrn_reflns_limit_k_min        -19 
_diffrn_reflns_limit_k_max        19 
_diffrn_reflns_limit_l_min        -20 
_diffrn_reflns_limit_l_max        20 
_diffrn_reflns_theta_min          1.39 
_diffrn_reflns_theta_max          29.57 
_reflns_number_total              12926 
_reflns_number_gt                 12083 
_reflns_threshold_expression      >2sigma(I) 
  
_computing_data_collection        'APEX2 3.0 (Bruker-AXS, 2008)' 
_computing_cell_refinement        'SAINT 7.46A (Bruker-AXS, 2008)' 
_computing_data_reduction         'SAINT 7.46A (Bruker-AXS, 2008)' 
_computing_structure_solution     'SHELXS-97 (Sheldrick, 2008)' 
_computing_structure_refinement   'SHELXL-97 (Sheldrick, 2008)' 
_computing_molecular_graphics     'Bruker SHELXTL' 
_computing_publication_material   'Bruker SHELXTL' 
  
_refine_special_details 
; 
 Refinement of F^2^ against ALL reflections.  The weighted R-factor wR and 
 goodness of fit S are based on F^2^, conventional R-factors R are based 
 on F, with F set to zero for negative F^2^. The threshold expression of 
 F^2^ > 2sigma(F^2^) is used only for calculating R-factors(gt) etc. and is 
 not relevant to the choice of reflections for refinement.  R-factors based 
 on F^2^ are statistically about twice as large as those based on F, and R- 
 factors based on ALL data will be even larger. 
; 
  
_refine_ls_structure_factor_coef  Fsqd 
_refine_ls_matrix_type            full 
_refine_ls_weighting_scheme       calc 
_refine_ls_weighting_details 
 'calc w=1/[\s^2^(Fo^2^)+(0.0301P)^2^+1.9618P] where P=(Fo^2^+2Fc^2^)/3' 
_atom_sites_solution_primary      direct 
_atom_sites_solution_secondary    difmap 
_atom_sites_solution_hydrogens    geom 
_refine_ls_hydrogen_treatment     mixed 
_refine_ls_extinction_method      none 
_refine_ls_extinction_coef        ? 
_refine_ls_number_reflns          12926 
_refine_ls_number_parameters      688 
_refine_ls_number_restraints      892 
_refine_ls_R_factor_all           0.0258 
_refine_ls_R_factor_gt            0.0228 
_refine_ls_wR_factor_ref          0.0612 
_refine_ls_wR_factor_gt           0.0593 
_refine_ls_goodness_of_fit_ref    1.092 
_refine_ls_restrained_S_all       1.091 
_refine_ls_shift/su_max           0.002 
_refine_ls_shift/su_mean          0.000 
  
loop_ 
 _atom_site_label 
 _atom_site_type_symbol 
 _atom_site_fract_x 
 _atom_site_fract_y 
 _atom_site_fract_z 
 _atom_site_U_iso_or_equiv 
 _atom_site_adp_type 
 _atom_site_occupancy 
 _atom_site_symmetry_multiplicity 
 _atom_site_calc_flag 
 _atom_site_refinement_flags 
 _atom_site_disorder_assembly 
 _atom_site_disorder_group 
C1 C 0.2633(2) 0.38638(16) 0.19894(15) 0.0234(4) Uani 1 1 d D . . 
H1A H 0.321(2) 0.4305(18) 0.1750(19) 0.028 Uiso 1 1 d D . . 
H1B H 0.1851(18) 0.4218(19) 0.2162(19) 0.028 Uiso 1 1 d D . . 
C2 C 0.3117(2) 0.30425(19) 0.27665(16) 0.0274(5) Uani 1 1 d D . . 
H2A H 0.3868(19) 0.324(2) 0.286(2) 0.033 Uiso 1 1 d D . . 
H2B H 0.252(2) 0.310(2) 0.3305(15) 0.033 Uiso 1 1 d D . . 
C3 C 0.3301(2) 0.19386(17) 0.25724(15) 0.0255(4) Uani 1 1 d D . . 
H3A H 0.274(2) 0.1557(19) 0.2954(18) 0.031 Uiso 1 1 d D . . 
H3B H 0.4135(17) 0.165(2) 0.255(2) 0.031 Uiso 1 1 d D . . 
W1 W 0.266363(7) 0.263402(5) 0.139230(5) 0.01605(3) Uani 1 1 d . . . 
O1 O 0.10667(13) 0.25044(10) 0.20858(10) 0.0188(3) Uani 1 1 d . . . 
C31 C 0.02193(18) 0.21886(14) 0.27467(13) 0.0172(4) Uani 1 1 d . A . 
C32 C 0.00706(18) 0.11938(14) 0.28853(13) 0.0177(4) Uani 1 1 d DU . . 
C321 C 0.0923(9) 0.0473(6) 0.2351(6) 0.0168(16) Uani 0.57(4) 1 d PDU A 1 
C322 C 0.0844(13) 0.0402(9) 0.1443(7) 0.0255(17) Uani 0.57(4) 1 d PDU A 1 
H322 H 0.0294 0.0866 0.1129 0.031 Uiso 0.57(4) 1 calc PR A 1 
C323 C 0.1544(14) -0.0325(8) 0.0983(6) 0.0315(19) Uani 0.57(4) 1 d PDU A 1 
H323 H 0.1445 -0.0370 0.0373 0.038 Uiso 0.57(4) 1 calc PR A 1 
C324 C 0.2383(13) -0.0982(7) 0.1423(8) 0.036(2) Uani 0.57(4) 1 d PDU A 1 
H324 H 0.2875 -0.1476 0.1113 0.043 Uiso 0.57(4) 1 calc PR A 1 
C325 C 0.2503(12) -0.0916(8) 0.2319(8) 0.034(2) Uani 0.57(4) 1 d PDU A 1 
H325 H 0.3080 -0.1364 0.2623 0.041 Uiso 0.57(4) 1 calc PR A 1 
C326 C 0.1777(14) -0.0191(10) 0.2779(9) 0.0232(19) Uani 0.57(4) 1 d PDU A 1 
H326 H 0.1870 -0.0152 0.3392 0.028 Uiso 0.57(4) 1 calc PR A 1 
C21C C 0.0751(12) 0.0500(8) 0.2295(9) 0.023(2) Uani 0.43(4) 1 d PDU A 2 
C22C C 0.0539(18) 0.0537(11) 0.1397(8) 0.022(2) Uani 0.43(4) 1 d PDU A 2 
H22C H 0.0008 0.1058 0.1130 0.026 Uiso 0.43(4) 1 calc PR A 2 
C23C C 0.111(2) -0.0198(12) 0.0901(8) 0.037(3) Uani 0.43(4) 1 d PDU A 2 
H23C H 0.0933 -0.0206 0.0303 0.044 Uiso 0.43(4) 1 calc PR A 2 
C24C C 0.195(2) -0.0919(10) 0.1266(10) 0.043(3) Uani 0.43(4) 1 d PDU A 2 
H24C H 0.2345 -0.1412 0.0912 0.052 Uiso 0.43(4) 1 calc PR A 2 
C25C C 0.2213(18) -0.0936(11) 0.2140(13) 0.040(3) Uani 0.43(4) 1 d PDU A 2 
H25C H 0.2809 -0.1420 0.2380 0.048 Uiso 0.43(4) 1 calc PR A 2 
C26C C 0.159(2) -0.0232(14) 0.2659(13) 0.027(3) Uani 0.43(4) 1 d PDU A 2 
H26C H 0.1744 -0.0250 0.3269 0.032 Uiso 0.43(4) 1 calc PR A 2 
C33 C -0.08010(19) 0.08645(14) 0.35939(14) 0.0191(4) Uani 1 1 d D A . 
C331 C -0.10337(19) -0.01678(15) 0.37838(14) 0.0200(4) Uani 1 1 d D . . 
C332 C -0.1190(2) -0.06930(16) 0.31033(15) 0.0267(5) Uani 1 1 d D A . 
H332 H -0.1131 -0.0395 0.2488 0.032 Uiso 1 1 calc R . . 
C333 C -0.1433(2) -0.16480(17) 0.33105(16) 0.0304(5) Uani 1 1 d D . . 
H333 H -0.1542 -0.1992 0.2837 0.037 Uiso 1 1 calc R A . 
C334 C -0.1516(2) -0.21014(16) 0.42079(16) 0.0296(5) Uani 1 1 d D A . 
H334 H -0.1675 -0.2754 0.4350 0.035 Uiso 1 1 calc R . . 
C335 C -0.1362(2) -0.15840(16) 0.48922(15) 0.0240(4) Uani 1 1 d D . . 
H335 H -0.1416 -0.1885 0.5506 0.029 Uiso 1 1 calc R A . 
C336 C -0.11320(19) -0.06284(15) 0.46820(14) 0.0215(4) Uani 1 1 d D A . 
H336 H -0.1039 -0.0281 0.5158 0.026 Uiso 1 1 calc R . . 
C34 C -0.14700(19) 0.15224(15) 0.41509(15) 0.0221(4) Uani 1 1 d . . . 
H34 H -0.2049 0.1297 0.4630 0.026 Uiso 1 1 calc R A . 
C35 C -0.13154(19) 0.25020(15) 0.40270(14) 0.0210(4) Uani 1 1 d D A . 
C351 C -0.20452(19) 0.31460(16) 0.46726(16) 0.0249(4) Uani 1 1 d D . . 
C352 C -0.2096(2) 0.28561(16) 0.56083(16) 0.0285(5) Uani 1 1 d D A . 
H352 H -0.1654 0.2256 0.5829 0.034 Uiso 1 1 calc R . . 
C353 C -0.2787(3) 0.34368(19) 0.62228(19) 0.0378(6) Uani 1 1 d D . . 
H353 H -0.2816 0.3232 0.6859 0.045 Uiso 1 1 calc R A . 
C354 C -0.3434(3) 0.4313(2) 0.5908(2) 0.0443(7) Uani 1 1 d D A . 
H354 H -0.3903 0.4711 0.6329 0.053 Uiso 1 1 calc R . . 
C355 C -0.3398(2) 0.46106(19) 0.4983(2) 0.0416(7) Uani 1 1 d D . . 
H355 H -0.3843 0.5212 0.4768 0.050 Uiso 1 1 calc R A . 
C356 C -0.2711(2) 0.40302(18) 0.43650(19) 0.0331(5) Uani 1 1 d D A . 
H356 H -0.2695 0.4236 0.3730 0.040 Uiso 1 1 calc R . . 
C36 C -0.04716(18) 0.28461(14) 0.33114(14) 0.0183(4) Uani 1 1 d D . . 
C361 C -0.02498(18) 0.38799(14) 0.31915(14) 0.0188(4) Uani 1 1 d D A . 
C362 C 0.0273(2) 0.42152(15) 0.38475(15) 0.0233(4) Uani 1 1 d D . . 
H362 H 0.0495 0.3780 0.4365 0.028 Uiso 1 1 calc R A . 
C363 C 0.0473(2) 0.51786(17) 0.37532(16) 0.0288(5) Uani 1 1 d D A . 
H363 H 0.0843 0.5396 0.4199 0.035 Uiso 1 1 calc R . . 
C364 C 0.0135(2) 0.58196(16) 0.30109(17) 0.0305(5) Uani 1 1 d D . . 
H364 H 0.0276 0.6476 0.2945 0.037 Uiso 1 1 calc R A . 
C365 C -0.0411(2) 0.55055(15) 0.23626(16) 0.0276(5) Uani 1 1 d D A . 
H365 H -0.0658 0.5950 0.1859 0.033 Uiso 1 1 calc R . . 
C366 C -0.05978(19) 0.45381(15) 0.24488(15) 0.0223(4) Uani 1 1 d D . . 
H366 H -0.0964 0.4325 0.2000 0.027 Uiso 1 1 calc R A . 
N1 N 0.40866(15) 0.27826(12) 0.07674(11) 0.0171(3) Uani 1 1 d D . . 
C11 C 0.51428(18) 0.29940(14) 0.02183(13) 0.0178(4) Uani 1 1 d D . . 
C12 C 0.50633(19) 0.34849(15) -0.06789(14) 0.0202(4) Uani 1 1 d D . . 
C121 C 0.3858(2) 0.37786(17) -0.10341(15) 0.0246(4) Uani 1 1 d D . . 
H121 H 0.3365 0.3242 -0.0805 0.029 Uiso 1 1 calc R . . 
C122 C 0.3943(3) 0.3936(3) -0.20699(18) 0.0451(7) Uani 1 1 d D . . 
H12A H 0.4358 0.4500 -0.2312 0.068 Uiso 1 1 calc R . . 
H12B H 0.3132 0.4054 -0.2249 0.068 Uiso 1 1 calc R . . 
H12C H 0.4395 0.3357 -0.2314 0.068 Uiso 1 1 calc R . . 
C123 C 0.3193(2) 0.46971(19) -0.06477(19) 0.0374(6) Uani 1 1 d D . . 
H12D H 0.3093 0.4577 0.0019 0.056 Uiso 1 1 calc R . . 
H12E H 0.2401 0.4865 -0.0859 0.056 Uiso 1 1 calc R . . 
H12F H 0.3660 0.5236 -0.0856 0.056 Uiso 1 1 calc R . . 
C13 C 0.6125(2) 0.37055(16) -0.12089(15) 0.0242(4) Uani 1 1 d . . . 
H13 H 0.6091 0.4044 -0.1806 0.029 Uiso 1 1 calc R . . 
C14 C 0.7236(2) 0.34433(17) -0.08873(16) 0.0266(4) Uani 1 1 d . . . 
H14 H 0.7947 0.3602 -0.1263 0.032 Uiso 1 1 calc R . . 
C15 C 0.73006(19) 0.29509(17) -0.00181(16) 0.0248(4) Uani 1 1 d . . . 
H15 H 0.8062 0.2763 0.0193 0.030 Uiso 1 1 calc R . . 
C16 C 0.62630(18) 0.27257(15) 0.05533(14) 0.0200(4) Uani 1 1 d DU B . 
C161 C 0.6341(2) 0.22052(16) 0.15103(15) 0.0242(4) Uani 1 1 d DU . . 
H161 H 0.5546 0.2394 0.1874 0.029 Uiso 0.539(7) 1 calc PR B 1 
H61A H 0.5576 0.1924 0.1723 0.029 Uiso 0.461(7) 1 calc PR B 2 
C162 C 0.6484(5) 0.1129(3) 0.1533(3) 0.0362(13) Uani 0.539(7) 1 d PDU B 1 
H16A H 0.6533 0.0816 0.2160 0.054 Uiso 0.539(7) 1 calc PR B 1 
H16B H 0.7222 0.0913 0.1144 0.054 Uiso 0.539(7) 1 calc PR B 1 
H16C H 0.5791 0.0951 0.1311 0.054 Uiso 0.539(7) 1 calc PR B 1 
C163 C 0.7296(5) 0.2540(4) 0.1978(4) 0.0364(13) Uani 0.539(7) 1 d PDU B 1 
H16D H 0.7159 0.3251 0.1943 0.055 Uiso 0.539(7) 1 calc PR B 1 
H16E H 0.8100 0.2332 0.1669 0.055 Uiso 0.539(7) 1 calc PR B 1 
H16F H 0.7236 0.2250 0.2618 0.055 Uiso 0.539(7) 1 calc PR B 1 
C62A C 0.7411(6) 0.1337(5) 0.1527(5) 0.049(2) Uani 0.461(7) 1 d PDU B 2 
H62A H 0.7314 0.0890 0.1109 0.073 Uiso 0.461(7) 1 calc PR B 2 
H62B H 0.7406 0.0989 0.2146 0.073 Uiso 0.461(7) 1 calc PR B 2 
H62C H 0.8176 0.1593 0.1336 0.073 Uiso 0.461(7) 1 calc PR B 2 
C63A C 0.6460(8) 0.2869(5) 0.2159(4) 0.0432(18) Uani 0.461(7) 1 d PDU B 2 
H63A H 0.6507 0.2500 0.2765 0.065 Uiso 0.461(7) 1 calc PR B 2 
H63B H 0.5758 0.3376 0.2183 0.065 Uiso 0.461(7) 1 calc PR B 2 
H63C H 0.7192 0.3170 0.1957 0.065 Uiso 0.461(7) 1 calc PR B 2 
N2 N 0.20139(16) 0.22596(12) 0.03028(12) 0.0193(3) Uani 1 1 d . . . 
C21 C 0.3736(2) 0.09170(18) -0.00333(18) 0.0331(5) Uani 1 1 d . . . 
H21A H 0.3890 0.0376 -0.0397 0.050 Uiso 1 1 calc R . . 
H21B H 0.3686 0.0661 0.0615 0.050 Uiso 1 1 calc R . . 
H21C H 0.4392 0.1312 -0.0196 0.050 Uiso 1 1 calc R . . 
C22 C 0.2569(2) 0.15341(15) -0.02213(15) 0.0242(4) Uani 1 1 d . . . 
C23 C 0.1863(2) 0.14913(16) -0.08771(16) 0.0287(5) Uani 1 1 d . . . 
H23 H 0.2023 0.1053 -0.1318 0.034 Uiso 1 1 calc R . . 
C24 C 0.0846(2) 0.22232(16) -0.07765(15) 0.0257(4) Uani 1 1 d . . . 
H24 H 0.0208 0.2366 -0.1141 0.031 Uiso 1 1 calc R . . 
C25 C 0.09577(19) 0.26847(15) -0.00551(14) 0.0204(4) Uani 1 1 d . . . 
C26 C 0.01663(19) 0.35392(16) 0.03089(15) 0.0241(4) Uani 1 1 d . . . 
H26A H -0.0314 0.3893 -0.0160 0.036 Uiso 1 1 calc R . . 
H26B H 0.0667 0.3973 0.0478 0.036 Uiso 1 1 calc R . . 
H26D H -0.0371 0.3310 0.0846 0.036 Uiso 1 1 calc R . . 
C1X C 0.4856(2) 0.2381(2) 0.4871(2) 0.141(3) Uani 0.725(5) 1 d PRDU C 1 
H1X H 0.4751 0.2939 0.4429 0.169 Uiso 0.725(5) 1 calc PR C 1 
C2X C 0.4549(3) 0.2469(2) 0.5792(2) 0.133(3) Uani 0.725(5) 1 d PRDU C 1 
H2X H 0.4234 0.3086 0.5979 0.160 Uiso 0.725(5) 1 calc PR C 1 
C3X C 0.4703(3) 0.1654(2) 0.64406(19) 0.139(3) Uani 0.725(5) 1 d PRDU C 1 
H3X H 0.4493 0.1714 0.7070 0.167 Uiso 0.725(5) 1 calc PR C 1 
C4X C 0.5165(3) 0.0751(2) 0.61674(19) 0.184(4) Uani 0.725(5) 1 d PRDU C 1 
H4X H 0.5270 0.0194 0.6610 0.221 Uiso 0.725(5) 1 calc PR C 1 
C5X C 0.5472(3) 0.0663(2) 0.5246(2) 0.237(5) Uani 0.725(5) 1 d PRDU C 1 
H5X H 0.5787 0.0046 0.5059 0.285 Uiso 0.725(5) 1 calc PR C 1 
C6X C 0.5317(3) 0.1478(2) 0.4598(2) 0.182(4) Uani 0.725(5) 1 d PRDU C 1 
H6X H 0.5527 0.1418 0.3969 0.218 Uiso 0.725(5) 1 calc PR C 1 
C1Y C 0.434(2) 0.0807(18) 0.5652(15) 0.173(5) Uani 0.275(5) 1 d PDU C 2 
H1Y H 0.4225 0.0896 0.5027 0.208 Uiso 0.275(5) 1 calc PR C 2 
C2Y C 0.4712(17) 0.1539(14) 0.6020(14) 0.126(4) Uani 0.275(5) 1 d PDU C 2 
H2Y H 0.4866 0.2128 0.5649 0.151 Uiso 0.275(5) 1 calc PR C 2 
C3Y C 0.4862(16) 0.1398(13) 0.6944(14) 0.136(5) Uani 0.275(5) 1 d PDU C 2 
H3Y H 0.5071 0.1915 0.7203 0.163 Uiso 0.275(5) 1 calc PR C 2 
C4Y C 0.4716(16) 0.0529(15) 0.7488(13) 0.118(5) Uani 0.275(5) 1 d PDU C 2 
H4Y H 0.4922 0.0410 0.8090 0.141 Uiso 0.275(5) 1 calc PR C 2 
C5Y C 0.426(2) -0.0160(15) 0.7127(17) 0.180(7) Uani 0.275(5) 1 d PDU C 2 
H5Y H 0.4034 -0.0719 0.7517 0.216 Uiso 0.275(5) 1 calc PR C 2 
C6Y C 0.412(3) -0.0059(17) 0.6202(18) 0.189(7) Uani 0.275(5) 1 d PDU C 2 
H6Y H 0.3885 -0.0571 0.5954 0.227 Uiso 0.275(5) 1 calc PR C 2 
  
loop_ 
 _atom_site_aniso_label 
 _atom_site_aniso_U_11 
 _atom_site_aniso_U_22 
 _atom_site_aniso_U_33 
 _atom_site_aniso_U_23 
 _atom_site_aniso_U_13 
 _atom_site_aniso_U_12 
C1 0.0248(10) 0.0227(10) 0.0230(10) -0.0056(8) 0.0015(8) -0.0057(8) 
C2 0.0305(11) 0.0359(12) 0.0190(10) -0.0078(9) -0.0041(8) -0.0090(10) 
C3 0.0255(10) 0.0293(11) 0.0200(10) 0.0012(8) -0.0026(8) -0.0031(9) 
W1 0.01745(4) 0.01552(4) 0.01439(4) -0.00168(3) -0.00083(3) -0.00138(3) 
O1 0.0216(7) 0.0178(6) 0.0163(7) -0.0021(5) 0.0004(5) -0.0035(5) 
C31 0.0183(8) 0.0186(9) 0.0141(9) 0.0007(7) -0.0033(7) -0.0027(7) 
C32 0.0217(9) 0.0173(8) 0.0143(9) -0.0001(7) -0.0049(7) -0.0028(7) 
C321 0.021(2) 0.016(3) 0.014(3) -0.008(2) 0.002(2) -0.0049(19) 
C322 0.031(4) 0.020(3) 0.025(3) 0.001(2) -0.007(2) -0.004(3) 
C323 0.046(5) 0.026(3) 0.025(3) -0.012(2) 0.003(3) -0.013(3) 
C324 0.048(5) 0.020(2) 0.037(4) -0.010(2) 0.010(3) -0.001(3) 
C325 0.041(4) 0.023(3) 0.032(4) -0.002(2) 0.002(3) 0.005(3) 
C326 0.028(4) 0.019(3) 0.021(4) -0.003(2) -0.002(2) 0.002(3) 
C21C 0.031(4) 0.018(4) 0.021(4) 0.007(3) -0.007(3) -0.008(3) 
C22C 0.034(6) 0.021(4) 0.012(3) -0.004(2) -0.007(3) -0.007(3) 
C23C 0.057(8) 0.033(5) 0.023(3) -0.010(3) 0.004(4) -0.019(5) 
C24C 0.068(9) 0.024(4) 0.036(5) -0.017(4) 0.010(5) -0.007(5) 
C25C 0.049(7) 0.022(3) 0.045(6) -0.009(4) -0.003(5) 0.005(4) 
C26C 0.037(7) 0.027(4) 0.019(4) -0.005(3) -0.005(3) -0.006(4) 
C33 0.0226(9) 0.0177(9) 0.0164(9) 0.0019(7) -0.0055(7) -0.0023(7) 
C331 0.0220(9) 0.0197(9) 0.0179(9) 0.0015(7) -0.0039(7) -0.0047(7) 
C332 0.0389(12) 0.0269(10) 0.0166(10) 0.0045(8) -0.0086(9) -0.0142(9) 
C333 0.0458(14) 0.0253(11) 0.0242(11) -0.0008(8) -0.0095(10) -0.0145(10) 
C334 0.0436(13) 0.0188(10) 0.0256(11) 0.0032(8) -0.0028(10) -0.0099(9) 
C335 0.0292(11) 0.0229(10) 0.0183(10) 0.0039(8) -0.0024(8) -0.0062(8) 
C336 0.0249(10) 0.0225(9) 0.0169(9) -0.0002(7) -0.0028(7) -0.0046(8) 
C34 0.0219(9) 0.0209(9) 0.0205(10) 0.0022(7) 0.0004(8) -0.0020(8) 
C35 0.0207(9) 0.0196(9) 0.0197(10) -0.0004(7) 0.0014(7) 0.0007(7) 
C351 0.0212(9) 0.0218(10) 0.0277(11) -0.0018(8) 0.0073(8) -0.0020(8) 
C352 0.0318(11) 0.0216(10) 0.0282(12) -0.0027(8) 0.0095(9) -0.0055(9) 
C353 0.0455(15) 0.0310(12) 0.0328(14) -0.0086(10) 0.0172(11) -0.0102(11) 
C354 0.0439(15) 0.0304(13) 0.0504(17) -0.0120(12) 0.0262(13) -0.0042(11) 
C355 0.0318(13) 0.0250(12) 0.0573(18) -0.0024(11) 0.0161(12) 0.0048(10) 
C356 0.0262(11) 0.0261(11) 0.0388(14) 0.0021(10) 0.0084(10) 0.0026(9) 
C36 0.0199(9) 0.0172(8) 0.0165(9) 0.0002(7) -0.0025(7) -0.0010(7) 
C361 0.0201(9) 0.0159(8) 0.0182(9) -0.0013(7) 0.0022(7) -0.0011(7) 
C362 0.0276(10) 0.0222(9) 0.0183(10) -0.0035(7) 0.0023(8) -0.0022(8) 
C363 0.0375(12) 0.0255(11) 0.0238(11) -0.0100(8) 0.0058(9) -0.0087(9) 
C364 0.0405(13) 0.0175(9) 0.0297(12) -0.0051(8) 0.0101(10) -0.0047(9) 
C365 0.0340(12) 0.0167(9) 0.0266(11) 0.0019(8) 0.0036(9) 0.0010(8) 
C366 0.0240(10) 0.0189(9) 0.0209(10) -0.0003(7) 0.0003(8) 0.0010(8) 
N1 0.0182(7) 0.0176(7) 0.0146(8) -0.0020(6) -0.0022(6) 0.0002(6) 
C11 0.0196(9) 0.0165(8) 0.0169(9) -0.0043(7) -0.0003(7) -0.0007(7) 
C12 0.0232(9) 0.0189(9) 0.0179(9) -0.0044(7) -0.0006(7) -0.0011(7) 
C121 0.0236(10) 0.0284(10) 0.0192(10) 0.0010(8) -0.0032(8) 0.0001(8) 
C122 0.0341(13) 0.076(2) 0.0215(12) 0.0004(13) -0.0042(10) -0.0013(14) 
C123 0.0360(13) 0.0325(13) 0.0375(14) 0.0010(10) -0.0053(11) 0.0092(11) 
C13 0.0274(10) 0.0239(10) 0.0200(10) -0.0047(8) 0.0034(8) -0.0044(8) 
C14 0.0232(10) 0.0292(11) 0.0272(11) -0.0081(9) 0.0057(8) -0.0076(9) 
C15 0.0185(9) 0.0282(10) 0.0287(11) -0.0083(9) -0.0011(8) -0.0036(8) 
C16 0.0199(9) 0.0192(9) 0.0210(10) -0.0056(7) -0.0024(7) -0.0010(7) 
C161 0.0217(9) 0.0252(10) 0.0254(11) -0.0002(8) -0.0065(8) -0.0021(8) 
C162 0.051(3) 0.022(2) 0.032(2) -0.0012(17) -0.002(2) 0.0013(19) 
C163 0.036(3) 0.045(3) 0.032(3) 0.007(2) -0.018(2) -0.016(2) 
C62A 0.044(4) 0.044(4) 0.049(4) 0.002(3) -0.013(3) 0.018(3) 
C63A 0.067(5) 0.040(3) 0.025(3) -0.002(2) -0.009(3) -0.011(3) 
N2 0.0209(8) 0.0183(8) 0.0186(8) -0.0032(6) -0.0022(6) -0.0015(6) 
C21 0.0382(13) 0.0250(11) 0.0361(13) -0.0130(9) -0.0096(10) 0.0082(10) 
C22 0.0332(11) 0.0180(9) 0.0209(10) -0.0046(7) -0.0040(8) 0.0002(8) 
C23 0.0441(13) 0.0211(10) 0.0216(11) -0.0055(8) -0.0080(9) -0.0008(9) 
C24 0.0342(11) 0.0217(10) 0.0224(11) -0.0013(8) -0.0101(9) -0.0034(9) 
C25 0.0231(9) 0.0193(9) 0.0186(9) 0.0004(7) -0.0034(7) -0.0044(8) 
C26 0.0213(9) 0.0257(10) 0.0250(11) -0.0056(8) -0.0038(8) 0.0003(8) 
C1X 0.074(5) 0.186(6) 0.193(6) -0.056(6) -0.020(5) -0.076(5) 
C2X 0.107(6) 0.143(5) 0.172(6) 0.007(5) -0.087(5) -0.046(5) 
C3X 0.060(4) 0.097(5) 0.264(7) 0.027(5) -0.082(6) -0.013(3) 
C4X 0.157(8) 0.157(5) 0.247(8) -0.028(6) -0.076(8) 0.001(6) 
C5X 0.200(10) 0.231(8) 0.247(9) 0.004(7) 0.004(10) 0.008(9) 
C6X 0.121(8) 0.184(9) 0.240(8) -0.025(6) -0.037(8) -0.011(8) 
C1Y 0.170(11) 0.160(10) 0.214(10) -0.034(8) -0.073(10) -0.040(9) 
C2Y 0.091(7) 0.110(8) 0.188(8) 0.004(7) -0.098(7) 0.001(7) 
C3Y 0.102(8) 0.122(8) 0.191(9) 0.004(7) -0.096(8) 0.009(8) 
C4Y 0.077(10) 0.113(10) 0.164(11) -0.011(8) -0.053(10) 0.013(9) 
C5Y 0.193(15) 0.156(12) 0.211(12) -0.035(11) -0.058(14) -0.041(11) 
C6Y 0.226(15) 0.155(11) 0.218(13) -0.042(11) -0.073(13) -0.065(12) 
  
_geom_special_details 
; 
 All esds (except the esd in the dihedral angle between two l.s. planes) 
 are estimated using the full covariance matrix.  The cell esds are taken 
 into account individually in the estimation of esds in distances, angles 
 and torsion angles; correlations between esds in cell parameters are only 
 used when they are defined by crystal symmetry.  An approximate (isotropic) 
 treatment of cell esds is used for estimating esds involving l.s. planes. 
; 
  
loop_ 
 _geom_bond_atom_site_label_1 
 _geom_bond_atom_site_label_2 
 _geom_bond_distance 
 _geom_bond_site_symmetry_2 
 _geom_bond_publ_flag 
C1 C2 1.603(3) . ? 
C1 W1 2.057(2) . ? 
C1 H1A 0.964(17) . ? 
C1 H1B 0.965(17) . ? 
C2 C3 1.597(3) . ? 
C2 W1 2.368(2) . ? 
C2 H2A 0.974(17) . ? 
C2 H2B 0.979(17) . ? 
C3 W1 2.058(2) . ? 
C3 H3A 0.963(17) . ? 
C3 H3B 0.967(17) . ? 
W1 N1 1.7676(17) . ? 
W1 O1 1.9703(15) . ? 
W1 N2 2.0581(18) . ? 
O1 C31 1.349(2) . ? 
C31 C36 1.411(3) . ? 
C31 C32 1.415(3) . ? 
C32 C33 1.415(3) . ? 
C32 C21C 1.465(10) . ? 
C32 C321 1.517(7) . ? 
C321 C326 1.392(8) . ? 
C321 C322 1.396(8) . ? 
C322 C323 1.394(8) . ? 
C322 H322 0.9500 . ? 
C323 C324 1.385(8) . ? 
C323 H323 0.9500 . ? 
C324 C325 1.389(8) . ? 
C324 H324 0.9500 . ? 
C325 C326 1.401(8) . ? 
C325 H325 0.9500 . ? 
C326 H326 0.9500 . ? 
C21C C26C 1.393(11) . ? 
C21C C22C 1.394(10) . ? 
C22C C23C 1.384(10) . ? 
C22C H22C 0.9500 . ? 
C23C C24C 1.379(10) . ? 
C23C H23C 0.9500 . ? 
C24C C25C 1.383(10) . ? 
C24C H24C 0.9500 . ? 
C25C C26C 1.387(11) . ? 
C25C H25C 0.9500 . ? 
C26C H26C 0.9500 . ? 
C33 C34 1.395(3) . ? 
C33 C331 1.493(3) . ? 
C331 C332 1.394(3) . ? 
C331 C336 1.398(3) . ? 
C332 C333 1.393(3) . ? 
C332 H332 0.9500 . ? 
C333 C334 1.394(3) . ? 
C333 H333 0.9500 . ? 
C334 C335 1.390(3) . ? 
C334 H334 0.9500 . ? 
C335 C336 1.389(3) . ? 
C335 H335 0.9500 . ? 
C336 H336 0.9500 . ? 
C34 C35 1.397(3) . ? 
C34 H34 0.9500 . ? 
C35 C36 1.408(3) . ? 
C35 C351 1.492(3) . ? 
C351 C352 1.394(3) . ? 
C351 C356 1.399(3) . ? 
C352 C353 1.391(3) . ? 
C352 H352 0.9500 . ? 
C353 C354 1.384(4) . ? 
C353 H353 0.9500 . ? 
C354 C355 1.382(4) . ? 
C354 H354 0.9500 . ? 
C355 C356 1.392(3) . ? 
C355 H355 0.9500 . ? 
C356 H356 0.9500 . ? 
C36 C361 1.494(3) . ? 
C361 C362 1.396(3) . ? 
C361 C366 1.397(3) . ? 
C362 C363 1.391(3) . ? 
C362 H362 0.9500 . ? 
C363 C364 1.382(3) . ? 
C363 H363 0.9500 . ? 
C364 C365 1.387(4) . ? 
C364 H364 0.9500 . ? 
C365 C366 1.393(3) . ? 
C365 H365 0.9500 . ? 
C366 H366 0.9500 . ? 
N1 C11 1.395(3) . ? 
C11 C16 1.412(3) . ? 
C11 C12 1.423(3) . ? 
C12 C13 1.392(3) . ? 
C12 C121 1.516(3) . ? 
C121 C122 1.524(3) . ? 
C121 C123 1.534(3) . ? 
C121 H121 1.0000 . ? 
C122 H12A 0.9800 . ? 
C122 H12B 0.9800 . ? 
C122 H12C 0.9800 . ? 
C123 H12D 0.9800 . ? 
C123 H12E 0.9800 . ? 
C123 H12F 0.9800 . ? 
C13 C14 1.392(3) . ? 
C13 H13 0.9500 . ? 
C14 C15 1.385(3) . ? 
C14 H14 0.9500 . ? 
C15 C16 1.398(3) . ? 
C15 H15 0.9500 . ? 
C16 C161 1.516(3) . ? 
C161 C63A 1.479(6) . ? 
C161 C162 1.491(5) . ? 
C161 C163 1.543(5) . ? 
C161 C62A 1.577(6) . ? 
C161 H161 1.0000 . ? 
C161 H61A 1.0000 . ? 
C162 H16A 0.9800 . ? 
C162 H16B 0.9800 . ? 
C162 H16C 0.9800 . ? 
C163 H16D 0.9800 . ? 
C163 H16E 0.9800 . ? 
C163 H16F 0.9800 . ? 
C62A H62A 0.9800 . ? 
C62A H62B 0.9800 . ? 
C62A H62C 0.9800 . ? 
C63A H63A 0.9800 . ? 
C63A H63B 0.9800 . ? 
C63A H63C 0.9800 . ? 
N2 C22 1.393(3) . ? 
N2 C25 1.396(3) . ? 
C21 C22 1.502(3) . ? 
C21 H21A 0.9800 . ? 
C21 H21B 0.9800 . ? 
C21 H21C 0.9800 . ? 
C22 C23 1.372(3) . ? 
C23 C24 1.424(3) . ? 
C23 H23 0.9500 . ? 
C24 C25 1.373(3) . ? 
C24 H24 0.9500 . ? 
C25 C26 1.501(3) . ? 
C26 H26A 0.9800 . ? 
C26 H26B 0.9800 . ? 
C26 H26D 0.9800 . ? 
C1X C6X 1.3899 . ? 
C1X C2X 1.3911 . ? 
C1X H1X 0.9500 . ? 
C2X C3X 1.3911 . ? 
C2X H2X 0.9500 . ? 
C3X C4X 1.3899 . ? 
C3X H3X 0.9500 . ? 
C4X C5X 1.3910 . ? 
C4X H4X 0.9500 . ? 
C5X C6X 1.3910 . ? 
C5X H5X 0.9500 . ? 
C6X H6X 0.9500 . ? 
C1Y C2Y 1.388(8) . ? 
C1Y C6Y 1.397(8) . ? 
C1Y H1Y 0.9500 . ? 
C2Y C3Y 1.401(8) . ? 
C2Y H2Y 0.9500 . ? 
C3Y C4Y 1.380(8) . ? 
C3Y H3Y 0.9500 . ? 
C4Y C5Y 1.379(8) . ? 
C4Y H4Y 0.9500 . ? 
C5Y C6Y 1.402(8) . ? 
C5Y H5Y 0.9500 . ? 
C6Y H6Y 0.9500 . ? 
  
loop_ 
 _geom_angle_atom_site_label_1 
 _geom_angle_atom_site_label_2 
 _geom_angle_atom_site_label_3 
 _geom_angle 
 _geom_angle_site_symmetry_1 
 _geom_angle_site_symmetry_3 
 _geom_angle_publ_flag 
C2 C1 W1 79.58(12) . . ? 
C2 C1 H1A 112.2(17) . . ? 
W1 C1 H1A 119.8(17) . . ? 
C2 C1 H1B 114.6(17) . . ? 
W1 C1 H1B 116.6(17) . . ? 
H1A C1 H1B 111(2) . . ? 
C3 C2 C1 117.44(18) . . ? 
C3 C2 W1 58.77(11) . . ? 
C1 C2 W1 58.67(11) . . ? 
C3 C2 H2A 111.8(18) . . ? 
C1 C2 H2A 103.3(18) . . ? 
W1 C2 H2A 126.1(18) . . ? 
C3 C2 H2B 107.8(18) . . ? 
C1 C2 H2B 105.5(18) . . ? 
W1 C2 H2B 122.8(18) . . ? 
H2A C2 H2B 111(2) . . ? 
C2 C3 W1 79.67(13) . . ? 
C2 C3 H3A 113.3(17) . . ? 
W1 C3 H3A 113.1(17) . . ? 
C2 C3 H3B 111.7(17) . . ? 
W1 C3 H3B 119.2(18) . . ? 
H3A C3 H3B 115(2) . . ? 
N1 W1 O1 178.55(6) . . ? 
N1 W1 C1 91.27(8) . . ? 
O1 W1 C1 87.54(7) . . ? 
N1 W1 N2 93.25(7) . . ? 
O1 W1 N2 87.08(7) . . ? 
C1 W1 N2 137.84(8) . . ? 
N1 W1 C3 96.24(8) . . ? 
O1 W1 C3 84.44(8) . . ? 
C1 W1 C3 83.30(9) . . ? 
N2 W1 C3 137.52(8) . . ? 
N1 W1 C2 95.44(8) . . ? 
O1 W1 C2 84.22(7) . . ? 
C1 W1 C2 41.75(9) . . ? 
N2 W1 C2 171.31(8) . . ? 
C3 W1 C2 41.56(9) . . ? 
C31 O1 W1 159.73(13) . . ? 
O1 C31 C36 119.53(18) . . ? 
O1 C31 C32 119.39(18) . . ? 
C36 C31 C32 121.03(18) . . ? 
C33 C32 C31 119.01(18) . . ? 
C33 C32 C21C 118.7(4) . . ? 
C31 C32 C21C 122.3(4) . . ? 
C33 C32 C321 120.3(3) . . ? 
C31 C32 C321 120.4(3) . . ? 
C21C C32 C321 8.2(8) . . ? 
C326 C321 C322 117.3(6) . . ? 
C326 C321 C32 120.1(7) . . ? 
C322 C321 C32 122.4(8) . . ? 
C323 C322 C321 122.3(7) . . ? 
C323 C322 H322 118.8 . . ? 
C321 C322 H322 118.8 . . ? 
C324 C323 C322 119.4(7) . . ? 
C324 C323 H323 120.3 . . ? 
C322 C323 H323 120.3 . . ? 
C323 C324 C325 119.6(6) . . ? 
C323 C324 H324 120.2 . . ? 
C325 C324 H324 120.2 . . ? 
C324 C325 C326 120.4(7) . . ? 
C324 C325 H325 119.8 . . ? 
C326 C325 H325 119.8 . . ? 
C321 C326 C325 120.9(7) . . ? 
C321 C326 H326 119.5 . . ? 
C325 C326 H326 119.5 . . ? 
C26C C21C C22C 119.9(9) . . ? 
C26C C21C C32 118.5(10) . . ? 
C22C C21C C32 121.5(10) . . ? 
C23C C22C C21C 119.0(9) . . ? 
C23C C22C H22C 120.5 . . ? 
C21C C22C H22C 120.5 . . ? 
C24C C23C C22C 120.6(9) . . ? 
C24C C23C H23C 119.7 . . ? 
C22C C23C H23C 119.7 . . ? 
C23C C24C C25C 121.0(9) . . ? 
C23C C24C H24C 119.5 . . ? 
C25C C24C H24C 119.5 . . ? 
C24C C25C C26C 118.8(10) . . ? 
C24C C25C H25C 120.6 . . ? 
C26C C25C H25C 120.6 . . ? 
C25C C26C C21C 120.6(10) . . ? 
C25C C26C H26C 119.7 . . ? 
C21C C26C H26C 119.7 . . ? 
C34 C33 C32 119.23(18) . . ? 
C34 C33 C331 117.91(19) . . ? 
C32 C33 C331 122.86(18) . . ? 
C332 C331 C336 117.92(19) . . ? 
C332 C331 C33 122.78(18) . . ? 
C336 C331 C33 119.28(19) . . ? 
C333 C332 C331 121.1(2) . . ? 
C333 C332 H332 119.5 . . ? 
C331 C332 H332 119.5 . . ? 
C332 C333 C334 120.4(2) . . ? 
C332 C333 H333 119.8 . . ? 
C334 C333 H333 119.8 . . ? 
C335 C334 C333 119.0(2) . . ? 
C335 C334 H334 120.5 . . ? 
C333 C334 H334 120.5 . . ? 
C336 C335 C334 120.3(2) . . ? 
C336 C335 H335 119.8 . . ? 
C334 C335 H335 119.8 . . ? 
C335 C336 C331 121.3(2) . . ? 
C335 C336 H336 119.4 . . ? 
C331 C336 H336 119.4 . . ? 
C33 C34 C35 122.07(19) . . ? 
C33 C34 H34 119.0 . . ? 
C35 C34 H34 119.0 . . ? 
C34 C35 C36 119.39(19) . . ? 
C34 C35 C351 118.34(19) . . ? 
C36 C35 C351 122.27(19) . . ? 
C352 C351 C356 118.6(2) . . ? 
C352 C351 C35 119.70(19) . . ? 
C356 C351 C35 121.7(2) . . ? 
C353 C352 C351 120.7(2) . . ? 
C353 C352 H352 119.6 . . ? 
C351 C352 H352 119.6 . . ? 
C354 C353 C352 120.0(3) . . ? 
C354 C353 H353 120.0 . . ? 
C352 C353 H353 120.0 . . ? 
C355 C354 C353 120.0(2) . . ? 
C355 C354 H354 120.0 . . ? 
C353 C354 H354 120.0 . . ? 
C354 C355 C356 120.1(2) . . ? 
C354 C355 H355 119.9 . . ? 
C356 C355 H355 119.9 . . ? 
C355 C356 C351 120.5(3) . . ? 
C355 C356 H356 119.7 . . ? 
C351 C356 H356 119.7 . . ? 
C35 C36 C31 119.24(18) . . ? 
C35 C36 C361 120.35(18) . . ? 
C31 C36 C361 120.27(18) . . ? 
C362 C361 C366 118.61(19) . . ? 
C362 C361 C36 119.97(18) . . ? 
C366 C361 C36 121.37(19) . . ? 
C363 C362 C361 120.8(2) . . ? 
C363 C362 H362 119.6 . . ? 
C361 C362 H362 119.6 . . ? 
C364 C363 C362 120.0(2) . . ? 
C364 C363 H363 120.0 . . ? 
C362 C363 H363 120.0 . . ? 
C363 C364 C365 120.1(2) . . ? 
C363 C364 H364 120.0 . . ? 
C365 C364 H364 120.0 . . ? 
C364 C365 C366 120.1(2) . . ? 
C364 C365 H365 120.0 . . ? 
C366 C365 H365 120.0 . . ? 
C365 C366 C361 120.4(2) . . ? 
C365 C366 H366 119.8 . . ? 
C361 C366 H366 119.8 . . ? 
C11 N1 W1 173.43(14) . . ? 
N1 C11 C16 120.25(18) . . ? 
N1 C11 C12 118.65(18) . . ? 
C16 C11 C12 121.10(19) . . ? 
C13 C12 C11 117.71(19) . . ? 
C13 C12 C121 121.30(19) . . ? 
C11 C12 C121 120.97(18) . . ? 
C12 C121 C122 113.97(19) . . ? 
C12 C121 C123 110.04(19) . . ? 
C122 C121 C123 109.8(2) . . ? 
C12 C121 H121 107.6 . . ? 
C122 C121 H121 107.6 . . ? 
C123 C121 H121 107.6 . . ? 
C121 C122 H12A 109.5 . . ? 
C121 C122 H12B 109.5 . . ? 
H12A C122 H12B 109.5 . . ? 
C121 C122 H12C 109.5 . . ? 
H12A C122 H12C 109.5 . . ? 
H12B C122 H12C 109.5 . . ? 
C121 C123 H12D 109.5 . . ? 
C121 C123 H12E 109.5 . . ? 
H12D C123 H12E 109.5 . . ? 
C121 C123 H12F 109.5 . . ? 
H12D C123 H12F 109.5 . . ? 
H12E C123 H12F 109.5 . . ? 
C12 C13 C14 121.7(2) . . ? 
C12 C13 H13 119.1 . . ? 
C14 C13 H13 119.1 . . ? 
C15 C14 C13 119.9(2) . . ? 
C15 C14 H14 120.1 . . ? 
C13 C14 H14 120.1 . . ? 
C14 C15 C16 121.1(2) . . ? 
C14 C15 H15 119.5 . . ? 
C16 C15 H15 119.5 . . ? 
C15 C16 C11 118.49(19) . . ? 
C15 C16 C161 120.68(19) . . ? 
C11 C16 C161 120.83(19) . . ? 
C63A C161 C162 134.9(4) . . ? 
C63A C161 C16 112.5(3) . . ? 
C162 C161 C16 111.6(3) . . ? 
C63A C161 C163 38.7(4) . . ? 
C162 C161 C163 113.0(3) . . ? 
C16 C161 C163 112.7(2) . . ? 
C63A C161 C62A 109.8(4) . . ? 
C162 C161 C62A 43.3(4) . . ? 
C16 C161 C62A 111.3(3) . . ? 
C163 C161 C62A 74.6(4) . . ? 
C63A C161 H161 69.4 . . ? 
C162 C161 H161 106.3 . . ? 
C16 C161 H161 106.3 . . ? 
C163 C161 H161 106.3 . . ? 
C62A C161 H161 138.5 . . ? 
C63A C161 H61A 107.7 . . ? 
C162 C161 H61A 66.5 . . ? 
C16 C161 H61A 107.7 . . ? 
C163 C161 H61A 135.4 . . ? 
C62A C161 H61A 107.7 . . ? 
H161 C161 H61A 42.4 . . ? 
C161 C162 H16A 109.5 . . ? 
C161 C162 H16B 109.5 . . ? 
H16A C162 H16B 109.5 . . ? 
C161 C162 H16C 109.5 . . ? 
H16A C162 H16C 109.5 . . ? 
H16B C162 H16C 109.5 . . ? 
C161 C163 H16D 109.5 . . ? 
C161 C163 H16E 109.5 . . ? 
H16D C163 H16E 109.5 . . ? 
C161 C163 H16F 109.5 . . ? 
H16D C163 H16F 109.5 . . ? 
H16E C163 H16F 109.5 . . ? 
C161 C62A H62A 109.5 . . ? 
C161 C62A H62B 109.5 . . ? 
H62A C62A H62B 109.5 . . ? 
C161 C62A H62C 109.5 . . ? 
H62A C62A H62C 109.5 . . ? 
H62B C62A H62C 109.5 . . ? 
C161 C63A H63A 109.5 . . ? 
C161 C63A H63B 109.5 . . ? 
H63A C63A H63B 109.5 . . ? 
C161 C63A H63C 109.5 . . ? 
H63A C63A H63C 109.5 . . ? 
H63B C63A H63C 109.5 . . ? 
C22 N2 C25 107.46(17) . . ? 
C22 N2 W1 125.60(14) . . ? 
C25 N2 W1 126.93(14) . . ? 
C22 C21 H21A 109.5 . . ? 
C22 C21 H21B 109.5 . . ? 
H21A C21 H21B 109.5 . . ? 
C22 C21 H21C 109.5 . . ? 
H21A C21 H21C 109.5 . . ? 
H21B C21 H21C 109.5 . . ? 
C23 C22 N2 108.73(19) . . ? 
C23 C22 C21 128.8(2) . . ? 
N2 C22 C21 122.4(2) . . ? 
C22 C23 C24 107.7(2) . . ? 
C22 C23 H23 126.2 . . ? 
C24 C23 H23 126.2 . . ? 
C25 C24 C23 107.3(2) . . ? 
C25 C24 H24 126.3 . . ? 
C23 C24 H24 126.3 . . ? 
C24 C25 N2 108.80(19) . . ? 
C24 C25 C26 129.1(2) . . ? 
N2 C25 C26 122.01(18) . . ? 
C25 C26 H26A 109.5 . . ? 
C25 C26 H26B 109.5 . . ? 
H26A C26 H26B 109.5 . . ? 
C25 C26 H26D 109.5 . . ? 
H26A C26 H26D 109.5 . . ? 
H26B C26 H26D 109.5 . . ? 
C6X C1X C2X 120.0 . . ? 
C6X C1X H1X 120.0 . . ? 
C2X C1X H1X 120.0 . . ? 
C1X C2X C3X 120.1 . . ? 
C1X C2X H2X 120.0 . . ? 
C3X C2X H2X 120.0 . . ? 
C4X C3X C2X 120.0 . . ? 
C4X C3X H3X 120.0 . . ? 
C2X C3X H3X 120.0 . . ? 
C3X C4X C5X 120.0 . . ? 
C3X C4X H4X 120.0 . . ? 
C5X C4X H4X 120.0 . . ? 
C6X C5X C4X 120.1 . . ? 
C6X C5X H5X 120.0 . . ? 
C4X C5X H5X 120.0 . . ? 
C1X C6X C5X 120.0 . . ? 
C1X C6X H6X 120.0 . . ? 
C5X C6X H6X 120.0 . . ? 
C2Y C1Y C6Y 119.9(12) . . ? 
C2Y C1Y H1Y 120.1 . . ? 
C6Y C1Y H1Y 120.1 . . ? 
C1Y C2Y C3Y 119.3(10) . . ? 
C1Y C2Y H2Y 120.4 . . ? 
C3Y C2Y H2Y 120.4 . . ? 
C4Y C3Y C2Y 121.8(10) . . ? 
C4Y C3Y H3Y 119.1 . . ? 
C2Y C3Y H3Y 119.1 . . ? 
C5Y C4Y C3Y 117.8(12) . . ? 
C5Y C4Y H4Y 121.1 . . ? 
C3Y C4Y H4Y 121.1 . . ? 
C4Y C5Y C6Y 121.8(11) . . ? 
C4Y C5Y H5Y 119.1 . . ? 
C6Y C5Y H5Y 119.1 . . ? 
C1Y C6Y C5Y 118.9(10) . . ? 
C1Y C6Y H6Y 120.6 . . ? 
C5Y C6Y H6Y 120.6 . . ? 
  
loop_ 
 _geom_torsion_atom_site_label_1 
 _geom_torsion_atom_site_label_2 
 _geom_torsion_atom_site_label_3 
 _geom_torsion_atom_site_label_4 
 _geom_torsion 
 _geom_torsion_site_symmetry_1 
 _geom_torsion_site_symmetry_2 
 _geom_torsion_site_symmetry_3 
 _geom_torsion_site_symmetry_4 
 _geom_torsion_publ_flag 
W1 C1 C2 C3 0.88(18) . . . . ? 
C1 C2 C3 W1 -0.88(18) . . . . ? 
C2 C1 W1 N1 -96.74(13) . . . . ? 
C2 C1 W1 O1 84.08(12) . . . . ? 
C2 C1 W1 N2 167.00(12) . . . . ? 
C2 C1 W1 C3 -0.61(13) . . . . ? 
C2 C3 W1 N1 91.16(13) . . . . ? 
C2 C3 W1 O1 -87.55(12) . . . . ? 
C2 C3 W1 C1 0.61(13) . . . . ? 
C2 C3 W1 N2 -167.07(12) . . . . ? 
C3 C2 W1 N1 -93.28(13) . . . . ? 
C1 C2 W1 N1 85.81(13) . . . . ? 
C3 C2 W1 O1 88.13(13) . . . . ? 
C1 C2 W1 O1 -92.78(12) . . . . ? 
C3 C2 W1 C1 -179.09(19) . . . . ? 
C3 C2 W1 N2 88.8(5) . . . . ? 
C1 C2 W1 N2 -92.1(5) . . . . ? 
C1 C2 W1 C3 179.09(19) . . . . ? 
N1 W1 O1 C31 -134(2) . . . . ? 
C1 W1 O1 C31 -99.5(4) . . . . ? 
N2 W1 O1 C31 122.3(4) . . . . ? 
C3 W1 O1 C31 -16.0(4) . . . . ? 
C2 W1 O1 C31 -57.8(4) . . . . ? 
W1 O1 C31 C36 116.3(4) . . . . ? 
W1 O1 C31 C32 -61.3(5) . . . . ? 
O1 C31 C32 C33 178.53(17) . . . . ? 
C36 C31 C32 C33 1.0(3) . . . . ? 
O1 C31 C32 C21C -4.2(8) . . . . ? 
C36 C31 C32 C21C 178.3(8) . . . . ? 
O1 C31 C32 C321 5.1(6) . . . . ? 
C36 C31 C32 C321 -172.4(5) . . . . ? 
C33 C32 C321 C326 -66.3(10) . . . . ? 
C31 C32 C321 C326 107.0(9) . . . . ? 
C21C C32 C321 C326 -147(5) . . . . ? 
C33 C32 C321 C322 109.6(7) . . . . ? 
C31 C32 C321 C322 -77.1(8) . . . . ? 
C21C C32 C321 C322 29(5) . . . . ? 
C326 C321 C322 C323 2.9(14) . . . . ? 
C32 C321 C322 C323 -173.1(8) . . . . ? 
C321 C322 C323 C324 -2.6(14) . . . . ? 
C322 C323 C324 C325 1.0(14) . . . . ? 
C323 C324 C325 C326 0.2(16) . . . . ? 
C322 C321 C326 C325 -1.7(18) . . . . ? 
C32 C321 C326 C325 174.5(11) . . . . ? 
C324 C325 C326 C321 0(2) . . . . ? 
C33 C32 C21C C26C -70.0(14) . . . . ? 
C31 C32 C21C C26C 112.8(13) . . . . ? 
C321 C32 C21C C26C 34(5) . . . . ? 
C33 C32 C21C C22C 107.5(9) . . . . ? 
C31 C32 C21C C22C -69.7(10) . . . . ? 
C321 C32 C21C C22C -149(5) . . . . ? 
C26C C21C C22C C23C 4.3(18) . . . . ? 
C32 C21C C22C C23C -173.1(11) . . . . ? 
C21C C22C C23C C24C -4.5(18) . . . . ? 
C22C C23C C24C C25C 1(2) . . . . ? 
C23C C24C C25C C26C 2(2) . . . . ? 
C24C C25C C26C C21C -2(3) . . . . ? 
C22C C21C C26C C25C -1(3) . . . . ? 
C32 C21C C26C C25C 176.6(16) . . . . ? 
C31 C32 C33 C34 -1.5(3) . . . . ? 
C21C C32 C33 C34 -178.9(7) . . . . ? 
C321 C32 C33 C34 171.9(5) . . . . ? 
C31 C32 C33 C331 179.16(18) . . . . ? 
C21C C32 C33 C331 1.8(8) . . . . ? 
C321 C32 C33 C331 -7.4(6) . . . . ? 
C34 C33 C331 C332 133.0(2) . . . . ? 
C32 C33 C331 C332 -47.7(3) . . . . ? 
C34 C33 C331 C336 -45.3(3) . . . . ? 
C32 C33 C331 C336 134.0(2) . . . . ? 
C336 C331 C332 C333 -0.2(4) . . . . ? 
C33 C331 C332 C333 -178.6(2) . . . . ? 
C331 C332 C333 C334 -0.4(4) . . . . ? 
C332 C333 C334 C335 0.5(4) . . . . ? 
C333 C334 C335 C336 0.1(4) . . . . ? 
C334 C335 C336 C331 -0.8(3) . . . . ? 
C332 C331 C336 C335 0.8(3) . . . . ? 
C33 C331 C336 C335 179.2(2) . . . . ? 
C32 C33 C34 C35 0.6(3) . . . . ? 
C331 C33 C34 C35 179.93(19) . . . . ? 
C33 C34 C35 C36 0.9(3) . . . . ? 
C33 C34 C35 C351 -178.2(2) . . . . ? 
C34 C35 C351 C352 49.4(3) . . . . ? 
C36 C35 C351 C352 -129.7(2) . . . . ? 
C34 C35 C351 C356 -129.0(2) . . . . ? 
C36 C35 C351 C356 51.9(3) . . . . ? 
C356 C351 C352 C353 -0.5(4) . . . . ? 
C35 C351 C352 C353 -178.9(2) . . . . ? 
C351 C352 C353 C354 -0.1(4) . . . . ? 
C352 C353 C354 C355 0.3(5) . . . . ? 
C353 C354 C355 C356 0.0(5) . . . . ? 
C354 C355 C356 C351 -0.5(4) . . . . ? 
C352 C351 C356 C355 0.7(4) . . . . ? 
C35 C351 C356 C355 179.1(2) . . . . ? 
C34 C35 C36 C31 -1.4(3) . . . . ? 
C351 C35 C36 C31 177.69(19) . . . . ? 
C34 C35 C36 C361 -177.18(19) . . . . ? 
C351 C35 C36 C361 1.9(3) . . . . ? 
O1 C31 C36 C35 -177.06(18) . . . . ? 
C32 C31 C36 C35 0.4(3) . . . . ? 
O1 C31 C36 C361 -1.3(3) . . . . ? 
C32 C31 C36 C361 176.22(18) . . . . ? 
C35 C36 C361 C362 66.2(3) . . . . ? 
C31 C36 C361 C362 -109.5(2) . . . . ? 
C35 C36 C361 C366 -111.3(2) . . . . ? 
C31 C36 C361 C366 73.0(3) . . . . ? 
C366 C361 C362 C363 -1.7(3) . . . . ? 
C36 C361 C362 C363 -179.2(2) . . . . ? 
C361 C362 C363 C364 1.1(3) . . . . ? 
C362 C363 C364 C365 0.4(4) . . . . ? 
C363 C364 C365 C366 -1.2(4) . . . . ? 
C364 C365 C366 C361 0.7(3) . . . . ? 
C362 C361 C366 C365 0.8(3) . . . . ? 
C36 C361 C366 C365 178.3(2) . . . . ? 
O1 W1 N1 C11 -34(3) . . . . ? 
C1 W1 N1 C11 -68.5(13) . . . . ? 
N2 W1 N1 C11 69.6(13) . . . . ? 
C3 W1 N1 C11 -151.9(13) . . . . ? 
C2 W1 N1 C11 -110.1(13) . . . . ? 
W1 N1 C11 C16 150.9(12) . . . . ? 
W1 N1 C11 C12 -28.9(14) . . . . ? 
N1 C11 C12 C13 178.77(18) . . . . ? 
C16 C11 C12 C13 -1.0(3) . . . . ? 
N1 C11 C12 C121 0.3(3) . . . . ? 
C16 C11 C12 C121 -179.54(19) . . . . ? 
C13 C12 C121 C122 23.4(3) . . . . ? 
C11 C12 C121 C122 -158.1(2) . . . . ? 
C13 C12 C121 C123 -100.4(2) . . . . ? 
C11 C12 C121 C123 78.0(3) . . . . ? 
C11 C12 C13 C14 1.2(3) . . . . ? 
C121 C12 C13 C14 179.7(2) . . . . ? 
C12 C13 C14 C15 -0.1(3) . . . . ? 
C13 C14 C15 C16 -1.2(3) . . . . ? 
C14 C15 C16 C11 1.3(3) . . . . ? 
C14 C15 C16 C161 -178.7(2) . . . . ? 
N1 C11 C16 C15 -179.98(18) . . . . ? 
C12 C11 C16 C15 -0.2(3) . . . . ? 
N1 C11 C16 C161 0.0(3) . . . . ? 
C12 C11 C16 C161 179.86(19) . . . . ? 
C15 C16 C161 C63A 79.8(4) . . . . ? 
C11 C16 C161 C63A -100.2(4) . . . . ? 
C15 C16 C161 C162 -90.7(3) . . . . ? 
C11 C16 C161 C162 89.3(3) . . . . ? 
C15 C16 C161 C163 37.7(4) . . . . ? 
C11 C16 C161 C163 -142.3(3) . . . . ? 
C15 C16 C161 C62A -44.0(4) . . . . ? 
C11 C16 C161 C62A 136.0(4) . . . . ? 
N1 W1 N2 C22 52.45(18) . . . . ? 
O1 W1 N2 C22 -128.96(18) . . . . ? 
C1 W1 N2 C22 147.95(17) . . . . ? 
C3 W1 N2 C22 -50.4(2) . . . . ? 
C2 W1 N2 C22 -129.6(5) . . . . ? 
N1 W1 N2 C25 -126.66(17) . . . . ? 
O1 W1 N2 C25 51.93(17) . . . . ? 
C1 W1 N2 C25 -31.2(2) . . . . ? 
C3 W1 N2 C25 130.44(18) . . . . ? 
C2 W1 N2 C25 51.3(6) . . . . ? 
C25 N2 C22 C23 -1.4(2) . . . . ? 
W1 N2 C22 C23 179.36(15) . . . . ? 
C25 N2 C22 C21 -180.0(2) . . . . ? 
W1 N2 C22 C21 0.8(3) . . . . ? 
N2 C22 C23 C24 1.2(3) . . . . ? 
C21 C22 C23 C24 179.7(2) . . . . ? 
C22 C23 C24 C25 -0.6(3) . . . . ? 
C23 C24 C25 N2 -0.3(3) . . . . ? 
C23 C24 C25 C26 176.7(2) . . . . ? 
C22 N2 C25 C24 1.0(2) . . . . ? 
W1 N2 C25 C24 -179.73(15) . . . . ? 
C22 N2 C25 C26 -176.19(19) . . . . ? 
W1 N2 C25 C26 3.1(3) . . . . ? 
C6X C1X C2X C3X 0.0 . . . . ? 
C1X C2X C3X C4X 0.0 . . . . ? 
C2X C3X C4X C5X 0.0 . . . . ? 
C3X C4X C5X C6X 0.0 . . . . ? 
C2X C1X C6X C5X 0.0 . . . . ? 
C4X C5X C6X C1X 0.0 . . . . ? 
C6Y C1Y C2Y C3Y -0.5(11) . . . . ? 
C1Y C2Y C3Y C4Y 3.9(10) . . . . ? 
C2Y C3Y C4Y C5Y -8(2) . . . . ? 
C3Y C4Y C5Y C6Y 10(3) . . . . ? 
C2Y C1Y C6Y C5Y 2(2) . . . . ? 
C4Y C5Y C6Y C1Y -7(3) . . . . ? 
  
_diffrn_measured_fraction_theta_max    0.996 
_diffrn_reflns_theta_full              29.57 
_diffrn_measured_fraction_theta_full   0.996 
_refine_diff_density_max    1.156 
_refine_diff_density_min   -0.620 
_refine_diff_density_rms    0.092 
